# Supplementary material
Source: Copernicus journal article supplement (doi:10.5194/egusphere-2026-986)
Supplement: Supplementary file 1 [file egusphere-2026-986-supplement.pdf]

**Supplementary Information for**

**Performance and Controlling Factors of Airborne LiDAR Snow  
Depth Estimates in Boreal Forests: Insights from NASA SnowEx 2023 Alaska  
Campaign**

Jipeng Liu<sup>1</sup>, Eunsang Cho<sup>1</sup>, Carrie Vuyovich<sup>2</sup>

(a) CPCRW

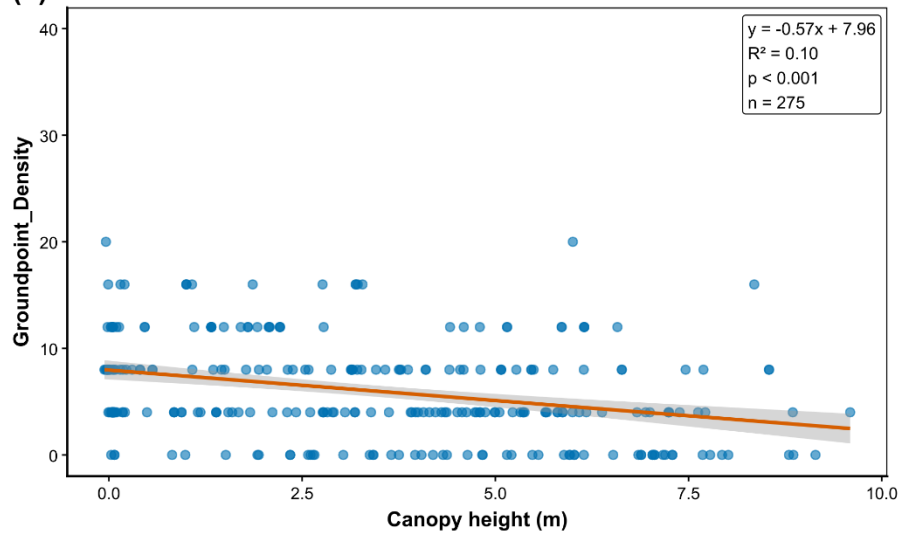

(b) BCEF

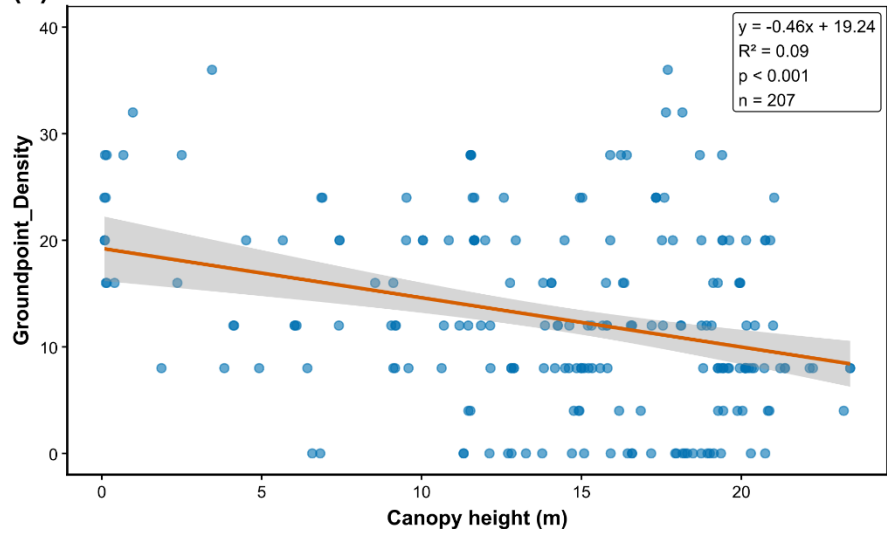

(c) FLCF

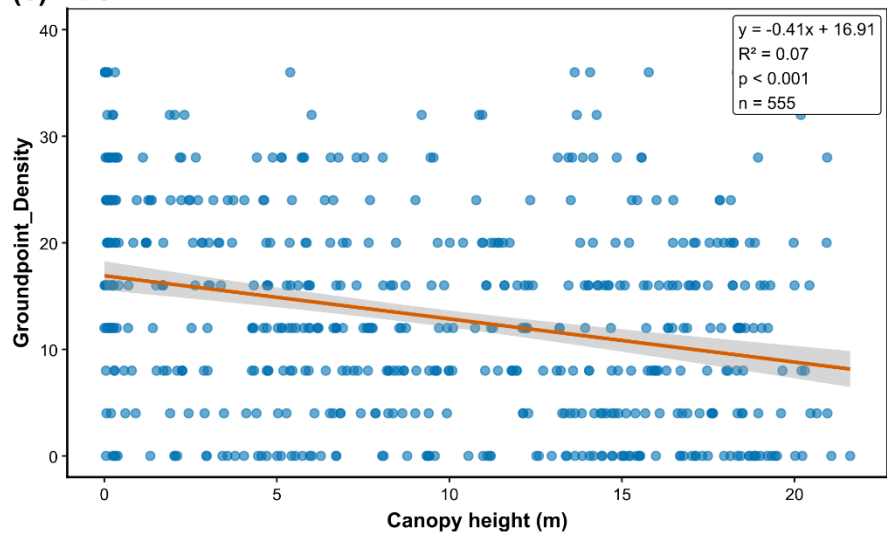

*FigS1: Relationship between Canopy Height and Ground Point Density*

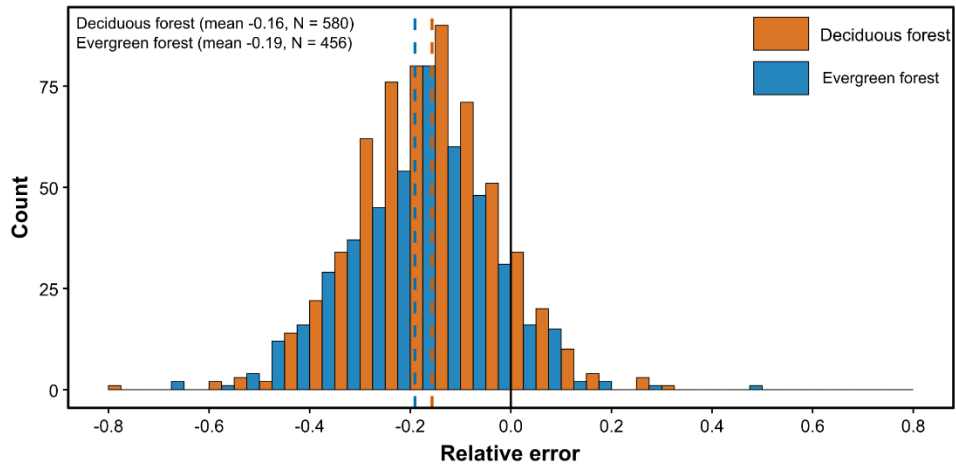

*Figure S2: Relative Error Distribution by Vegetation Type*

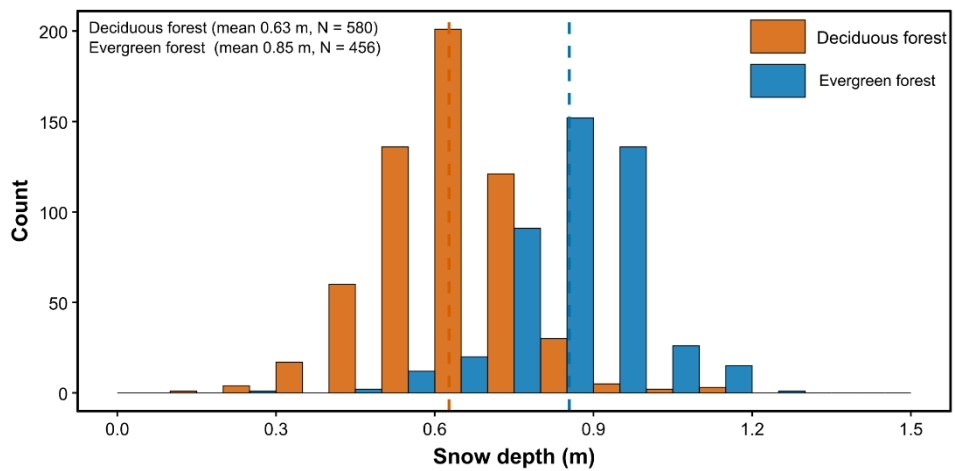

*Figure S3: Snow Depth Distribution by Vegetation Type*

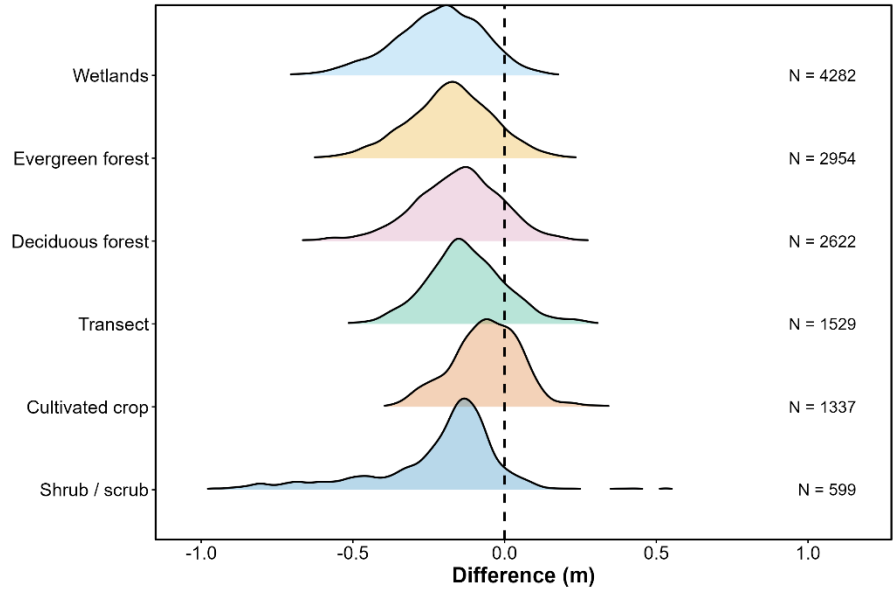

Figure S4: Distribution of LiDAR–In Situ Snow Depth Differences by Vegetation Type

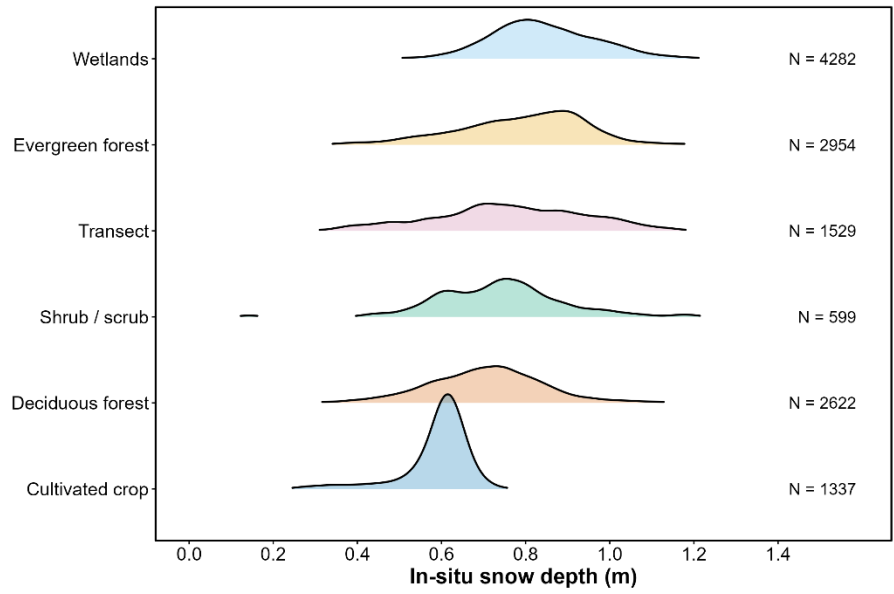

Figure S5: Distribution of In Situ Snow Depth by Vegetation Type
